# Supplementary material for: New insights into Rossby wave packet properties in the extratropical UTLS using GNSS radio occultations
Source: Copernicus journal article supplement (doi:10.5194/acp-20-11569-2020), 2020-10-12
Supplement: Supplementary file 1 [file acp-20-11569-2020-supplement.pdf]

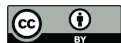

*Supplement of*

## **New insights into Rossby wave packet properties in the extratropical UTLS using GNSS radio occultations**

**Robin Pilch Kedzierski et al.**

*Correspondence to:* Robin Pilch Kedzierski ([rpilch@geomar.de](mailto:rpilch@geomar.de))

The copyright of individual parts of the supplement might differ from the CC BY 4.0 License.

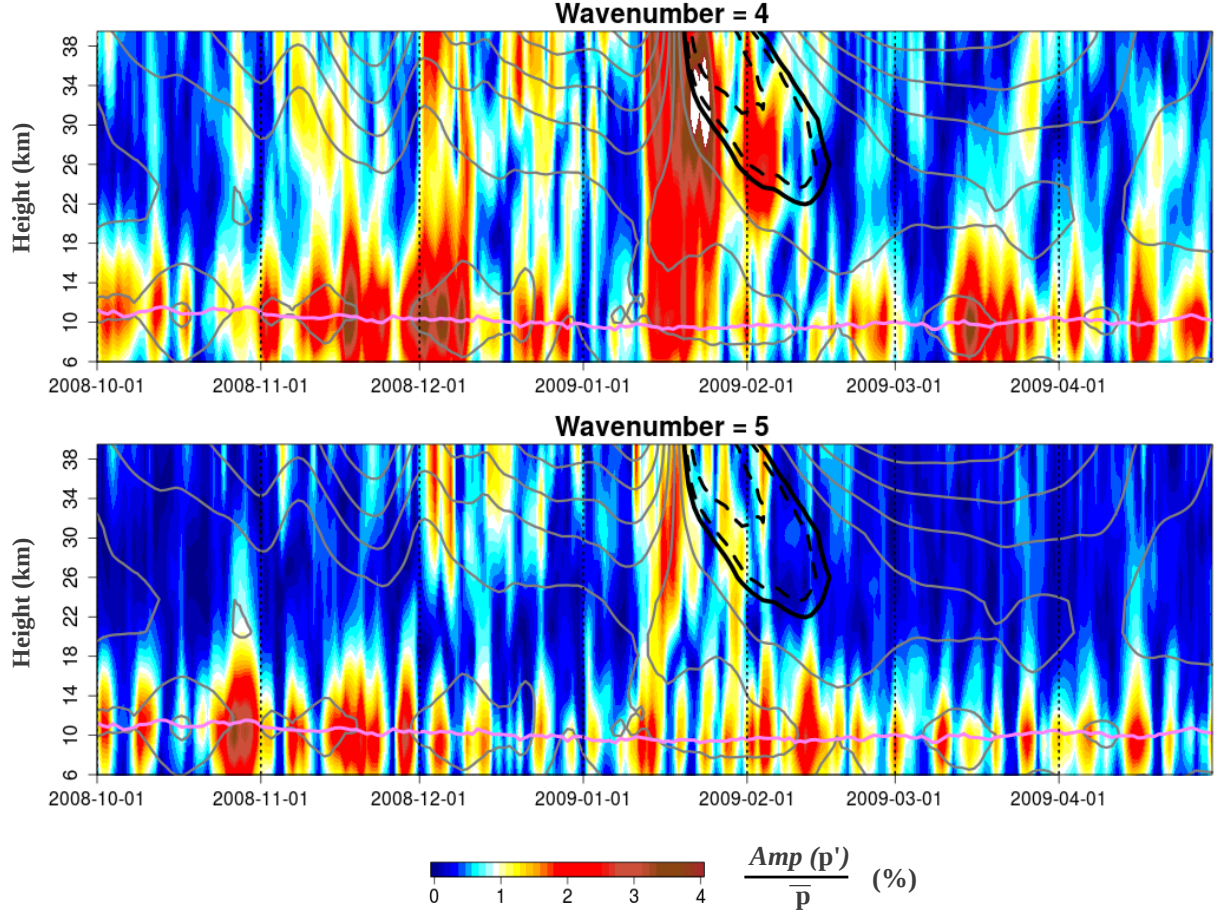

**Figure S1.** Time-height sections of wave activity for wavenumbers 4-5 at 50°N, in terms of the amplitude of the individual harmonics of pressure anomalies, relative to the mean pressure of each vertical level (colours). Magenta line denotes the zonal-mean  $TP_z$ . Grey solid lines denote westerly zonal winds, with  $10 \text{ ms}^{-1}$  separation. Thick black solid and dashed lines denote  $0 \text{ ms}^{-1}$ ,  $-3 \text{ ms}^{-1}$  and  $-10 \text{ ms}^{-1}$ , respectively. To improve visibility, the ERA-Interim zonal-mean zonal wind is displayed with a running mean of  $\pm 15$  days. Same as Fig. 2 from the main manuscript, but focused on w4/w5, winter/spring time and with extended vertical range.

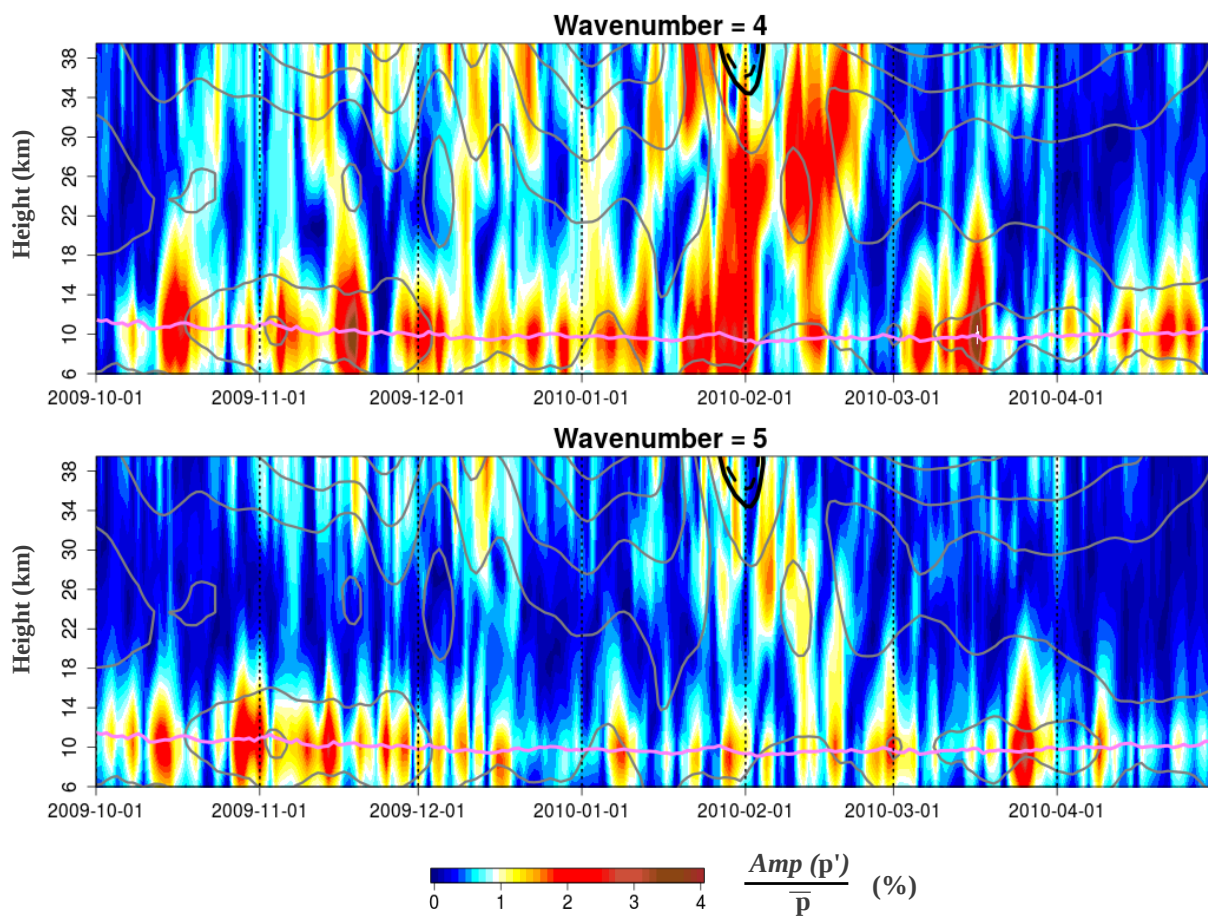

**Figure S2.** Same as in Fig. S1 but for the 2010 SSW case.

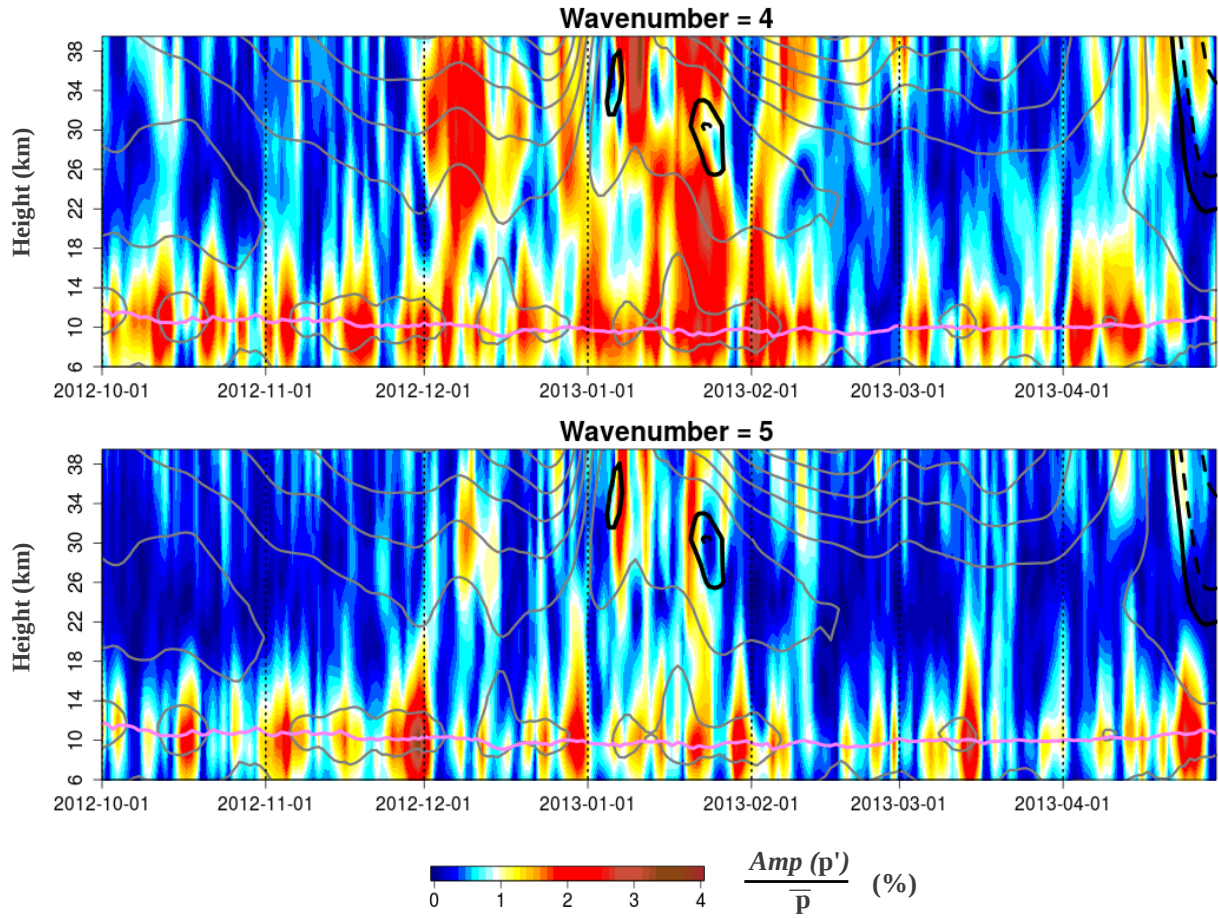

**Figure S3.** Same as in Figs. S1 and S2 but for the 2013 SSW case.

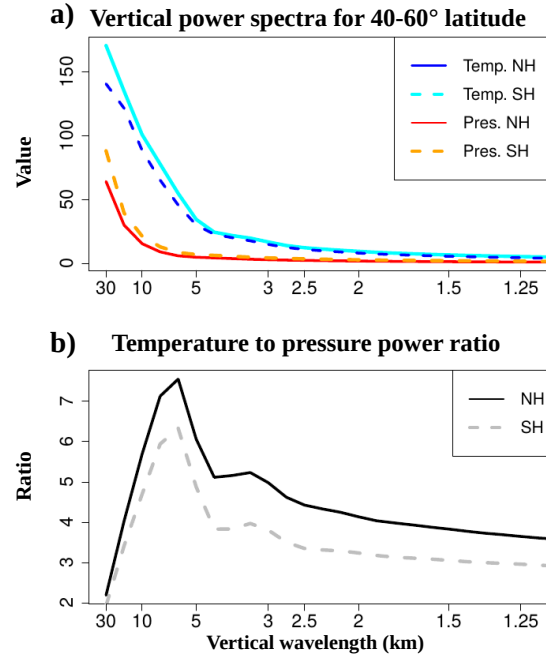

**Figure S4.** (a) Vertical power spectra of all RWP (w4-8) longitude-height snapshots between 40-60° latitude for both hemispheres. (b) Ratio of temperature and pressure power spectra. Same as Fig. 10 from the main manuscript, only w4-8 are filtered also in the time dimension as 2-20 day, eastward-propagating.

## Anticorrelation of Temp. signals between UT and LS

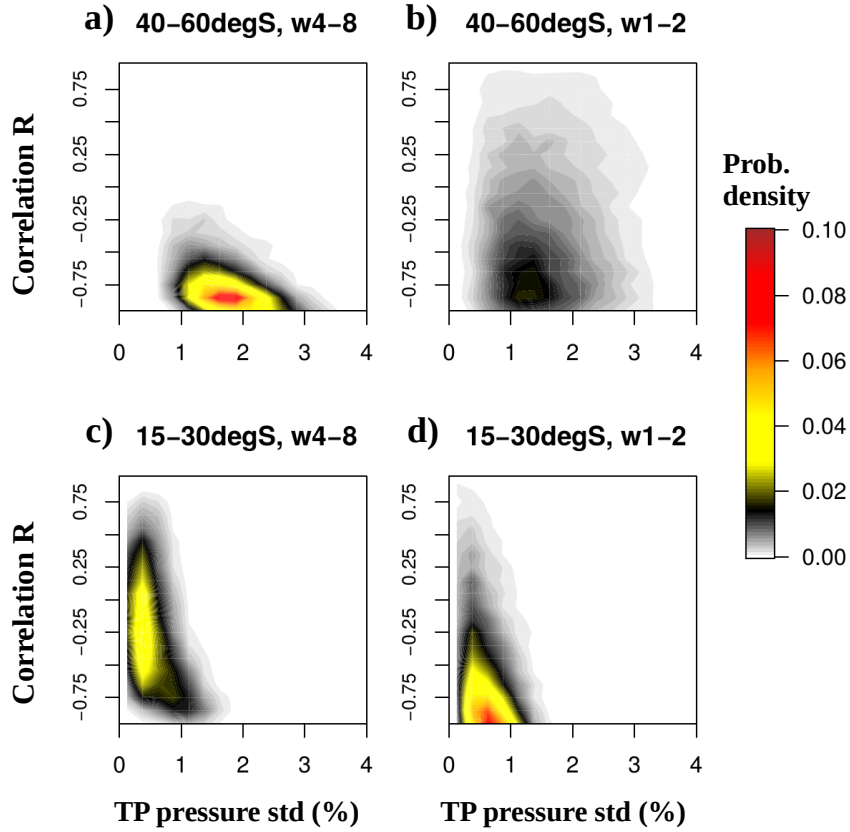

**Figure S5.** Probability density functions of the UT-LS temperature correlation -vs- wave amplitudes for RWPs (w4–8, left column) and planetary waves (w1–2, right column) at mid-latitudes (top row) and the subtropics (bottom row). Same as Fig. 11 in the main manuscript, but for the Southern hemisphere.
